# Supplementary material for: Discovery of two highly divergent negative-sense RNA viruses associated with the parasitic nematode, Capillaria hepatica, in wild Mus musculus from New York City
Source: PubMed Central journal article supplement (PMC7363305; doi:10.1099/jgv.0.001315), 2019-09-12
Supplement: jgv-100-1350-s001.pdf [file jgv-100-1350-s001.pdf]

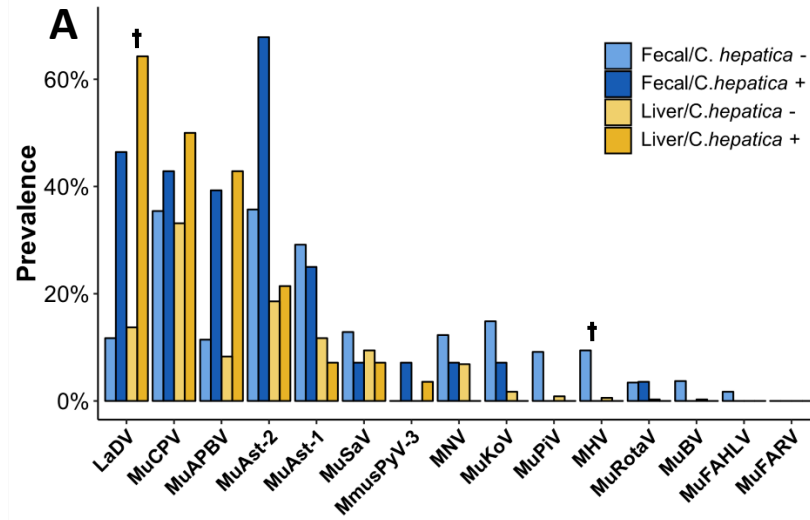

**B**  
Liver

| Virus     | Odds Ratio | 95% CI           | P-Value |
|-----------|------------|------------------|---------|
| LaDV      | 3.84       | (1.21, 13.67)    | 0.0216† |
| MuSaV     | 0.77       | (0.14, 2.93)     | 0.7208  |
| MuPIV     | 0.52       | (0, 16.76)       | 0.7467  |
| MuFARV    | 2.67       | (0, 1556.18)     | 0.7445  |
| MuFAHLV   | 2.67       | (0, 1556.18)     | 0.7445  |
| MuAst-2   | 0.70       | (0.23, 1.87)     | 0.4859  |
| MuAst-1   | 1.33       | (0.25, 5.17)     | 0.7062  |
| MHV       | 1.53       | (0.01, 38.92)    | 0.8309  |
| MuRotaV   | 1.33       | (0, 35.01)       | 0.8838  |
| MuBV      | 7.68       | (0.01, 61504.73) | 0.7364  |
| MuAPBV    | 2.81       | (0.93, 9.07)     | 0.0682  |
| MuCPV     | 0.82       | (0.26, 2.67)     | 0.7311  |
| MuKoV     | 1.00       | (0.01, 16.71)    | 0.998   |
| MmusPyV-3 | 11.02      | (0.04, 6369.63)  | 0.3123  |
| MNV       | 0.92       | (0, 17.67)       | 0.9678  |

Fecal

| Virus     | Odds Ratio | 95% CI          | P-Value |
|-----------|------------|-----------------|---------|
| LaDV      | 1.57       | (0.53, 4.67)    | 0.4109  |
| MuSaV     | 0.52       | (0.1, 1.85)     | 0.3325  |
| MuPIV     | 0.25       | (0, 4.11)       | 0.3849  |
| MuFARV    | 2.67       | (0, 1556.18)    | 0.7445  |
| MuFAHLV   | 0.27       | (0, 5.67)       | 0.4446  |
| MuAst-2   | 1.51       | (0.55, 4.5)     | 0.4328  |
| MuAst-1   | 0.65       | (0.24, 1.64)    | 0.3719  |
| MHV       | 0.11       | (0, 0.86)       | 0.0323† |
| MuRotaV   | 0.67       | (0.06, 3.68)    | 0.6686  |
| MuBV      | 3.61       | (0.01, 765.94)  | 0.5881  |
| MuAPBV    | 2.10       | (0.76, 6.01)    | 0.1505  |
| MuCPV     | 0.88       | (0.33, 2.3)     | 0.792   |
| MuKoV     | 0.77       | (0.14, 3.01)    | 0.725   |
| MmusPyV-3 | 8.79       | (0.03, 2822.61) | 0.426   |
| MNV       | 1.02       | (0.13, 6.91)    | 0.9847  |

**Supplemental Figure 1.** Association between *Capillaria hepatica* infection and carriage of individual viruses identified by PCR in a prior study of the same mouse population. **(A)** Bar graph displaying prevalence of 15 viruses in the feces or liver of mice with or without *Capillaria hepatica* infection. **(B)** Association between nematode infection and carriage of viruses in the liver or feces. Odds ratios were calculated using Firth logistic regression analysis. †, crude  $P < 0.05$ , however, after controlling the family-wise error rate, these associations were not significant. LaDV, lactate dehydrogenase-elevating virus; MuSaV, murine sapovirus; MuPIV, murine picornavirus; MuFARV, murine feces-associated rhabdovirus; MuFAHLV, murine feces-associated hepe-like virus; MuAst-2, murine astrovirus 2; MuAst-1, murine astrovirus 1; MHV, murine hepatitis virus; MuRotaV, murine rotavirus; MuBV, murine bocavirus; MuAPBV, murine-associated porcine bocavirus; MuCPV, murine chapparrivirus; MuKoV, murine kobuvirus; MmusPyV-3, Mus musculus polyomavirus 3; MNV, murine norovirus
